# Supplementary figures and images for: Reinforcement signaling of punishment versus relief in fruit flies
Source: PubMed Central journal article supplement — Learn Mem. 2018 Jun;25(6):247–57. doi: 10.1101/lm.047308.118 (PMC5959229; doi:10.1101/lm.047308.118), 2018-06

6x [ ⚡⚡⚡⚡☁ ]

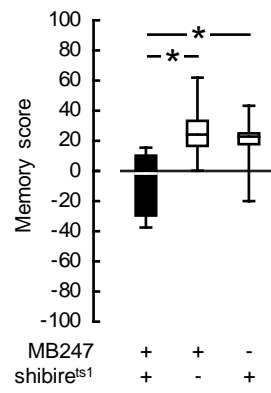

Supplement: supp_25.6.247_Supplemental_FigS2.pdf [file supp_25.6.247_Supplemental_FigS2.pdf]

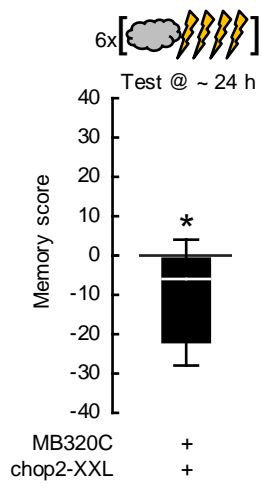

Supplement: supp_25.6.247_Supplemental_FigS4.pdf [file supp_25.6.247_Supplemental_FigS4.pdf]

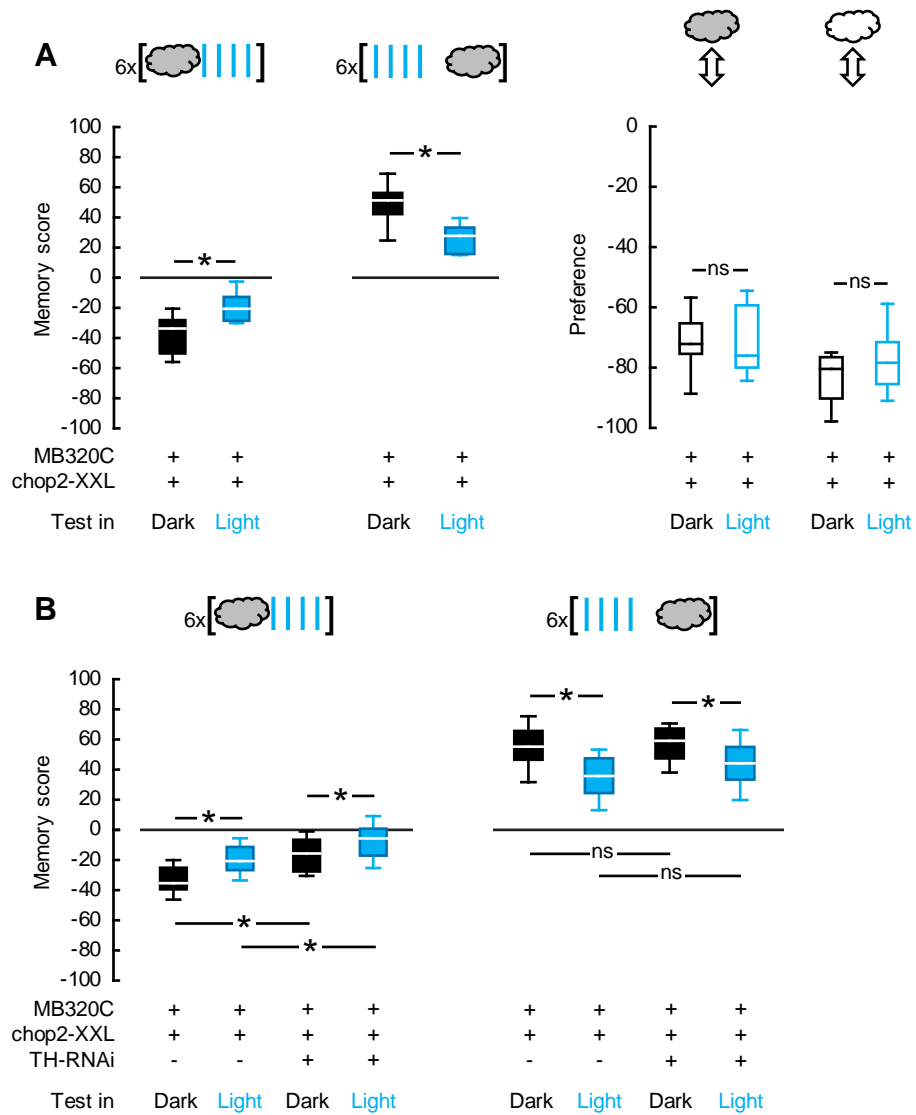

Fig. S6

Supplement: supp_25.6.247_Supplemental_FigS6.pdf [file supp_25.6.247_Supplemental_FigS6.pdf]

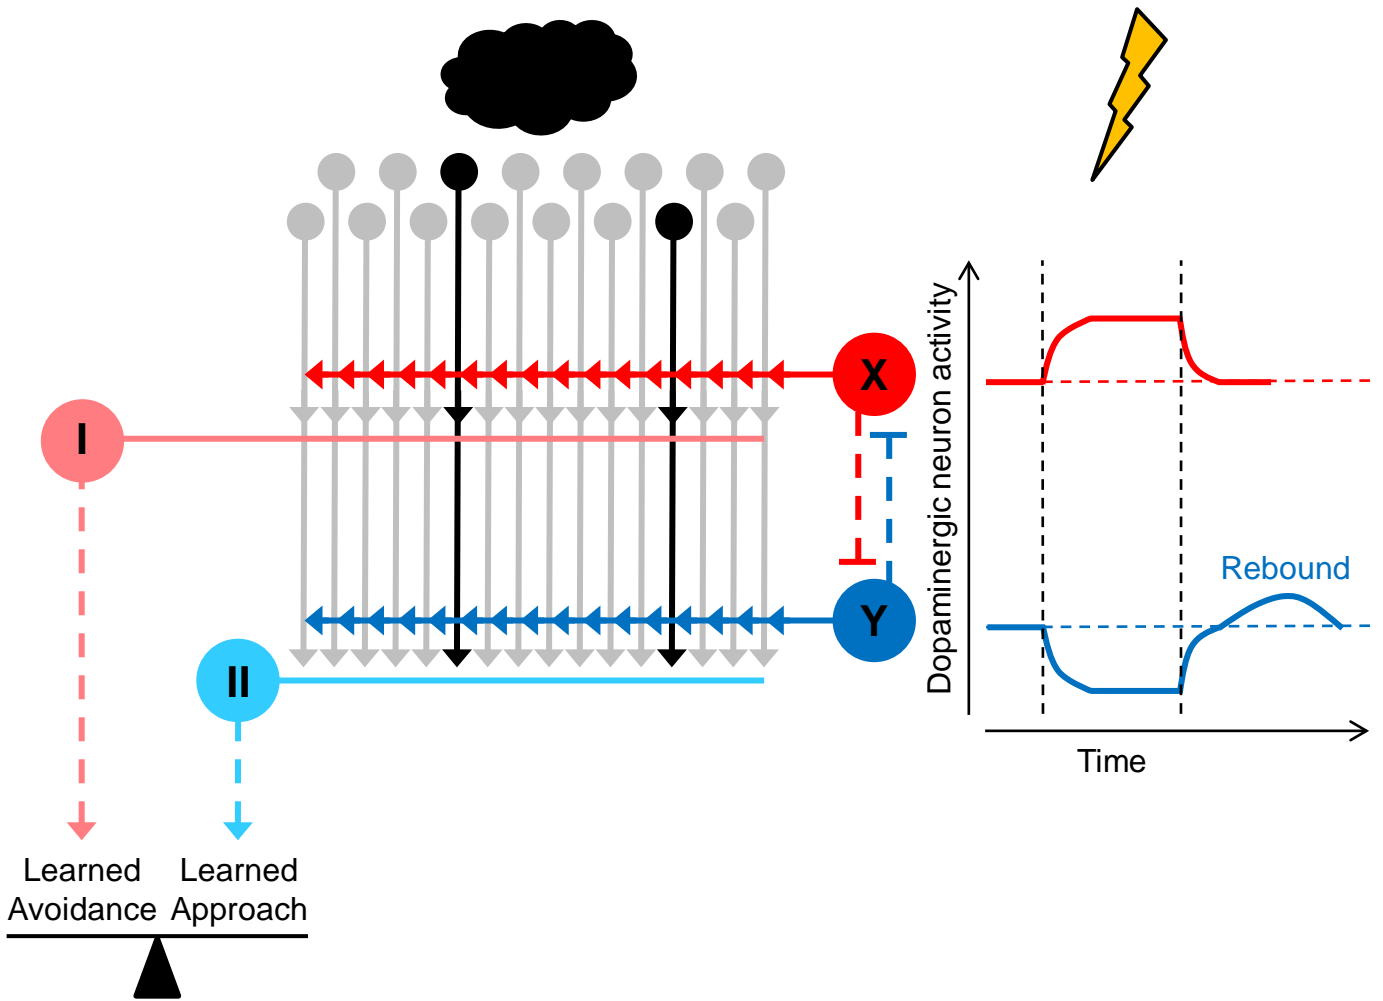

Fig. S7

Supplement: supp_25.6.247_Supplemental_FigS7.pdf [file supp_25.6.247_Supplemental_FigS7.pdf]
